# Supplementary material for: Advancing Measurement-Informed Care in Outpatient Community Behavioral Health
Source: Atypon-hosted journal article supplement (doi:10.1176/appi.ps.20240082), 2024-08-27
Supplement: appi.ps.20240082.ds001.pdf [file appi.ps.20240082.ds001.pdf]

**Supplemental Table 1. Tier 1 Measures**

| Name                                                                                                            | Metric Specifications                                                                                                                                                                                                                                                                                                                                                                                                  | Source                        | Medicaid/<br>CCBHC | Self-<br>Report | #<br>Items | Implementation and Proposed<br>Modification                                                                                                                                                                                                                                                                                                                |
|-----------------------------------------------------------------------------------------------------------------|------------------------------------------------------------------------------------------------------------------------------------------------------------------------------------------------------------------------------------------------------------------------------------------------------------------------------------------------------------------------------------------------------------------------|-------------------------------|--------------------|-----------------|------------|------------------------------------------------------------------------------------------------------------------------------------------------------------------------------------------------------------------------------------------------------------------------------------------------------------------------------------------------------------|
| Depression Response/Remission at Six Months                                                                     | The percentage of adolescent patients (12-17 years of age) and adult patients (18 years of age or older) with major depression or dysthymia who reached response (PHQ-9 50% reduction) or remission (PHQ-9 <5) in six months (+/- 60 days) after an index event date.                                                                                                                                                  | APA-MBHR (12) (see also NCQA) | Yes                | Yes             | 10         | <ul style="list-style-type: none"> <li>Recommended frequency of assessment is monthly.</li> <li>Consider creating a categorical cut point for response instead of percent reduction.</li> <li>Episode-based time interval should be revised to last score in calendar year.</li> </ul>                                                                     |
| Anxiety Response at Six Months                                                                                  | The percentage of adult patients (18 years of age or older) with an anxiety disorder (e.g., generalized anxiety disorder, social anxiety disorder or panic disorder) who demonstrated a response to treatment (GAD-7 score at least 25% less than score at index event) at six months (+/- 60 days) after an index visit.                                                                                              | APA-MBHR (12)                 | Yes                | Yes             | 8          | <ul style="list-style-type: none"> <li>Recommended frequency of assessment is monthly.</li> <li>Consider creating a categorical cut point for response instead of percent reduction.</li> <li>Episode-based time interval should be revised to last score in calendar year.</li> </ul>                                                                     |
| Alcohol Use Disorder Outcome Response                                                                           | The percentage of adult patients (18 years of age or older) who report problems with drinking alcohol (e.g., can be noted through a screening measure such as the AUDIT-C as described in MIPS Clinical Quality Measure Quality ID #431, aka NQF 2152, or other drug/alcohol screeners such as the DAST and TAPS) <i>and</i> demonstrated a response to treatment at three months (+/- 60 days) after the index visit. | APA-MBHR (12)                 | Yes                | Yes             | 3          | <ul style="list-style-type: none"> <li>Create a categorical cut point to indicate alcohol treatment response indicating drinking within NIAAA (or other) safe limits.</li> </ul>                                                                                                                                                                           |
| Comprehensive Diabetes Care for People with Serious Mental Illness: Hemoglobin A1c (HbA1c) Poor Control (>9.0%) | Members 18-75 years of age with at least one acute inpatient visit or two outpatient visits for schizophrenia or bipolar I disorder, or at least one inpatient visit for major depression during the measurement year <i>and</i> diabetes (type 1 and type 2) and whose HbA1c level was greater than 9.0% or was missing a result, or for whom an HbA1c test was not done.                                             | Medicaid (11, 14)             | Yes                | No              | 1          | <ul style="list-style-type: none"> <li>HbA1c outcome measure is aligned with NCQA diabetes screening of bipolar and schizophrenia patients receiving atypical antipsychotic medications.</li> <li>Frequency of assessment is at least twice a year when stable at target; frequency is greater at two to three months when HbA1c not at target.</li> </ul> |
| Comprehensive                                                                                                   | Members 18-75 years of age with at least one acute                                                                                                                                                                                                                                                                                                                                                                     | NCQA in SAMHSA                | Yes                | No              | 1          | <ul style="list-style-type: none"> <li>Cut point could be updated with</li> </ul>                                                                                                                                                                                                                                                                          |

|                                                                                              |                                                                                                                                                                                                                                                                                    |                                 |     |    |   |                                                                                                                                                                                                                                                                                                                 |
|----------------------------------------------------------------------------------------------|------------------------------------------------------------------------------------------------------------------------------------------------------------------------------------------------------------------------------------------------------------------------------------|---------------------------------|-----|----|---|-----------------------------------------------------------------------------------------------------------------------------------------------------------------------------------------------------------------------------------------------------------------------------------------------------------------|
| Diabetes Care for People with Serious Mental Illness: Blood Pressure Control (<140/90 mm Hg) | inpatient visit or two outpatient visits for schizophrenia or bipolar I disorder, or at least one inpatient visit for major depression during the measurement year <i>and</i> diabetes (type 1 and type 2) and whose most recent blood pressure screening result was <140/90mm Hg. | (4)                             |     |    |   | new guidance (130/65 mm Hg).                                                                                                                                                                                                                                                                                    |
| Diabetes Monitoring for People with Diabetes and Schizophrenia<br>"                          | Assesses adults 18-64 years of age with schizophrenia and diabetes who had both an LDL-C test and an HbA1c test during the measurement year.                                                                                                                                       | NCQA in SAMHSA (4), APA-ADA (3) | Yes | No | 2 | <ul style="list-style-type: none"> <li>• Modify the screening and monitoring measure to create an outcome measure consistent with the recommendations of the joint consensus APA/ADA statement on antipsychotic medication (17).</li> <li>• Create a cut point to indicate LDL-C treatment response.</li> </ul> |

Complete reference list for Tier 1 measures is in (10).

**Supplemental Table 2. Tier 2 Measures**

| Concept                 | Measure Preliminary Draft                                                                          | Candidate Scale(s)                                                                                                                                | Candidate Scale Specification                                                                                                                                                                                                                                                                                                                                                                                                                                                               | Free of Charge                           | Self-Report | # Items  | Proposed Implementation or Modification                                                                                                                                                                                 |
|-------------------------|----------------------------------------------------------------------------------------------------|---------------------------------------------------------------------------------------------------------------------------------------------------|---------------------------------------------------------------------------------------------------------------------------------------------------------------------------------------------------------------------------------------------------------------------------------------------------------------------------------------------------------------------------------------------------------------------------------------------------------------------------------------------|------------------------------------------|-------------|----------|-------------------------------------------------------------------------------------------------------------------------------------------------------------------------------------------------------------------------|
| Disease Self-Management | Person reports adequate knowledge, skill, means, and confidence to manage their health care needs. | Gains in Patient Activation (PAM) Scores at 12 Months                                                                                             | The PAM is a 10- or 13-item questionnaire that assesses an individual’s knowledge, skill and confidence for managing their health and health care. The measure assesses individuals on a 0-100 scale. There are four levels of activation, from low (1) to high (4). The performance score would be the change in score from the baseline measurement to follow-up measurement, or the change in activation score over time for the eligible patients associated with the accountable unit. | Free for research but not for other uses | Yes         | 10 or 13 | <ul style="list-style-type: none"> <li>• Increase reassessment frequency to every three months.</li> <li>• Specify target change in score (e.g., move up one level).</li> </ul>                                         |
| Functioning             | Person reports ability to complete activities of daily living to their satisfaction.               | Daily Living Activities (DLA)-20                                                                                                                  | The DLA is a brief functional assessment tool for individuals ages 6+ regardless of diagnosis, disability or cultural background. Provides a 30-day snapshot of 20 domains and a summary of strengths and needs at a specific point related to whole-person health.                                                                                                                                                                                                                         | Fee for required training before use     | Yes         | 20       | <ul style="list-style-type: none"> <li>• Create categorical cut point to indicate treatment response.</li> <li>• Reassess every three months.</li> <li>• Shorten scale or prioritize among multiple domains.</li> </ul> |
|                         |                                                                                                    | Patient Reported Outcome Measurement Information System (PROMIS) v1.2 – Global Health Physical 2a and PROMIS Scale v1.2 – Global Health Mental 2a | There are two self-report, two-item versions of PROMIS scales to assess general physical and mental health that use the highest discriminating items from longer versions of the scales. Items are rated on five-point Likert scales.                                                                                                                                                                                                                                                       | Yes                                      | Yes         | 4        | <ul style="list-style-type: none"> <li>• Create categorical cut point to indicate treatment response.</li> <li>• Reassess every three months.</li> </ul>                                                                |
|                         |                                                                                                    | Sheehan Disability Scale (SDS)                                                                                                                    | The SDS evaluates symptom impact and impairment in the domains of work/school, social life/leisure and family life/home responsibility within the past week. These three items are responded to on a visual analogue scale ranging through 0 (no impairment), 1-3 (mild), 4-6 (moderate), 7-9 (marked) and 10 (extreme) disability.                                                                                                                                                         | Yes                                      | Yes         | 3 or 5   | <ul style="list-style-type: none"> <li>• Create categorical cut point to indicate treatment response.</li> <li>• Reassess every three months.</li> </ul>                                                                |
|                         |                                                                                                    | WHODAS 2.0                                                                                                                                        | The adult self-administered version of the WHODAS is a 12-item measure that assesses disability in adults ages 18 years                                                                                                                                                                                                                                                                                                                                                                     | Yes                                      | Yes         | 12       | <ul style="list-style-type: none"> <li>• Create categorical cut point to indicate treatment response.</li> </ul>                                                                                                        |

|                            |                                                                                            |                                                     |                                                                                                                                                                                                                                                                                                                                                                                                                                                                          |     |     |                                               |                                                                                                                                                          |
|----------------------------|--------------------------------------------------------------------------------------------|-----------------------------------------------------|--------------------------------------------------------------------------------------------------------------------------------------------------------------------------------------------------------------------------------------------------------------------------------------------------------------------------------------------------------------------------------------------------------------------------------------------------------------------------|-----|-----|-----------------------------------------------|----------------------------------------------------------------------------------------------------------------------------------------------------------|
|                            |                                                                                            |                                                     | and older. It assesses disability across six domains, including understanding and communicating, getting around, self-care, getting along with people, life activities (e.g., household, work and/or school activities) and participation in society. Individuals rate how much difficulty they have had in specific areas of functioning during the past 30 days.                                                                                                       |     |     |                                               | <ul style="list-style-type: none"> <li>• Reassess every three months.</li> <li>• Limit or prioritize reporting among multiple domains.</li> </ul>        |
| Goal Attainment            | Person reports making progress toward their top priority goals.                            | Goal Attainment Scaling (GAS)                       | To use the GAS, a patient identifies two goals among various areas of interest (see list in “What Matters Most Goal Inventory”) and rates progress along standardized, five-point Likert scale (“-2 = Much less than expected” through “+2 Much more than expected”), reassessed every three months. Anything 0 or above is coded as goal achieved (32).                                                                                                                 | Yes | Yes | 2                                             | <ul style="list-style-type: none"> <li>• Format for unsupported patient self-report with prompts and patient training/education.</li> </ul>              |
| Patient Experience of Care | Person reports that their experience of receiving care was positive.                       | CAHPS Experience of Care and Health Outcomes (ECHO) | Five CAHPS summary measures (composites) were created and tested for their psychometric properties: getting treatment quickly, how well clinicians communicate, perceived improvement, getting treatment information from the plan and information about treatment options. Item-total correlations were also assessed for the 31 single items with their respective composites. All but four of these single items had item-total correlations above 0.50 across sites. | Yes | Yes | 31, but users can select individual subscales | <ul style="list-style-type: none"> <li>• Shorten scale or limit to particular subscales/items.</li> </ul>                                                |
| Quality of Life            | Person reports that they have a life that is worth living.                                 | Medical Outcomes Study Item Short Form (SF)-12      | The SF-12 is a widely used, generic, patient-report measure created to assess health-related quality of life in the general population. Items describe difficulties with a range of activities and functions and are rated on a five-point scale from “None” to “Extreme or cannot do.”                                                                                                                                                                                  | Yes | Yes | 12                                            | <ul style="list-style-type: none"> <li>• Create categorical cut point to indicate treatment response.</li> <li>• Reassess every three months.</li> </ul> |
| Recovery                   | Person reports that their health and wellness enable them to live a self-directed life and | Herth Hope Index (HHI)                              | The HHI, originally published in 1991, was designed to evaluate hope in young people with chronic illnesses. It consists of 12 items. Responses are on a four-point Likert-type scale, from 1 (completely disagree) to                                                                                                                                                                                                                                                   | Yes | Yes | 12                                            | <ul style="list-style-type: none"> <li>• Resolve psychometric inconsistencies toward a more stable factor solution.</li> </ul>                           |

<https://psychiatryonline.org/doi/10.1176/appi.ps.20240082>

|  |                                       |  |                                                                                                         |  |  |  |  |
|--|---------------------------------------|--|---------------------------------------------------------------------------------------------------------|--|--|--|--|
|  | strive to reach their full potential. |  | 4 (completely agree). Although it is widely used, the factor solutions are inconsistent across studies. |  |  |  |  |
|--|---------------------------------------|--|---------------------------------------------------------------------------------------------------------|--|--|--|--|

Complete reference list for Tier 2 measures is in (10).
